# Supplementary material for: Surface fluorination treated indium-based quantum dots as a nonlinear saturable absorber for a passive Q-switched 1.0 μm laser
Source: Royal Society of Chemistry journal article supplement (doi:10.1039/d2ma00442a), 2022-01-01
Supplement: d2ma00442a1.pdf [file d2ma00442a1.pdf]

## Supporting Information

### Surface fluorination treated Indium-based quantum dots as a nonlinear saturable absorber for passive Q-switched 1.0 $\mu\text{m}$ laser

Xiaoli Zhang<sup>a</sup>, Yajun Lou<sup>b</sup>, Lei Hu<sup>a</sup>, Weijia Duan<sup>a</sup>, Guojie Chen<sup>c</sup>, Bingfeng Fan<sup>\*,c</sup>, Weiren Zhao<sup>\*,a</sup>, Xinhai Zhang<sup>\*,b</sup>

<sup>a</sup>Guangdong Province Key Laboratory of Information Photonics Technology, School of Physics and Opto-electronic Engineering, Guangzhou, 510006, China

<sup>b</sup>Department of Electric Electronic & Engineering, Southern University of Science and Technology, Shenzhen, 518055, China

<sup>c</sup>Guangdong-Hong Kong-Macao Joint Laboratory for Intelligent Micro-Nano Optoelectronic Technology, School of Physics and Optoelectronic Engineering, Foshan university, Foshan 528225, China

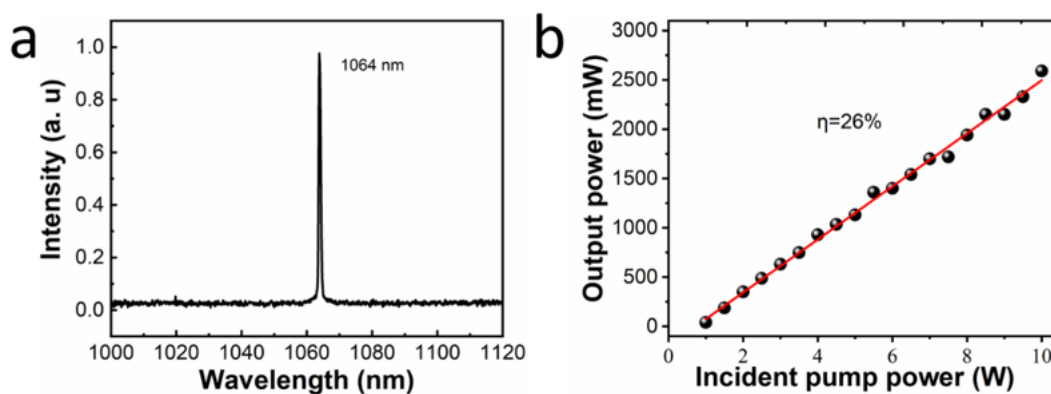

**Figure S1.** (a) Emission spectrum and (b) conversion efficiency of Q-switched laser without saturable absorber.
